# Supplementary material
Source: publisher figshare collection journal article supplement (https://karger.figshare.com/ndownloader/files/30833377)
Supplement: Supplementary file 1 [file 30833377]

**Supplementary Fig. 1 -** Process of retrieval of the existent FFPE samples. (a) Acral lentiginous melanoma cases were excluded from the study, as they harbour a distinct molecular profile from non-acral cutaneous melanoma. (b) Three melanoma patients had primary tumours of unknown origin (inexistent FFPE sample). (c) Nine FFPE samples belonged to other hospitals/institutions and could not be retrieved. (d) Nine FFPE samples were almost completely used up for clinical procedures and the remaining material was insufficient for analysis. (e) Two FFPE samples had severely degraded material that could not be used for analysis. (f) The 91 selected melanoma patients correspond to the 128 FFPE: in 59 cases, only 1 sample was retrieved, in 27 cases, 2 samples were retrieved, and in 5 cases, 3 samples were retrieved (59 (59*1) + 54 (27*2) + 15 (5*3) = 128).
